# Supplementary material for: Base damage, local sequence context and TP53 mutation hotspots: a molecular dynamics study of benzo[a]pyrene induced DNA distortion and mutability
Source: PubMed Central journal article supplement (PMC4627081; doi:10.1093/nar/gkv910), 2015-09-22

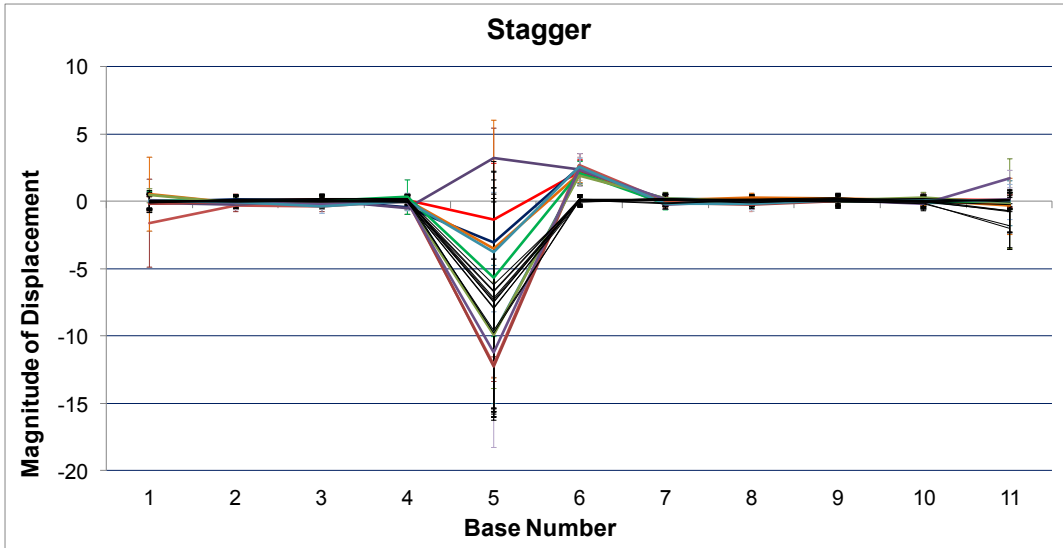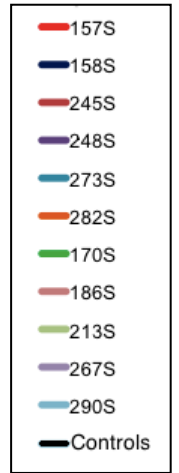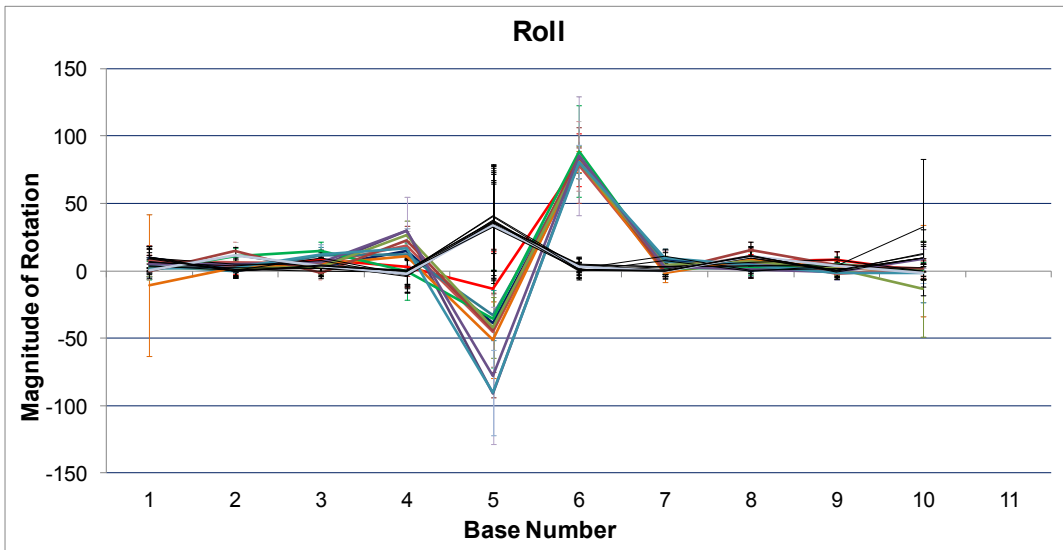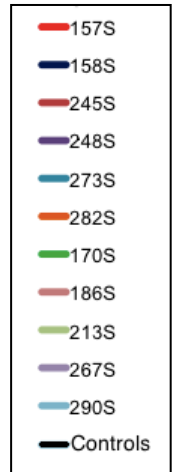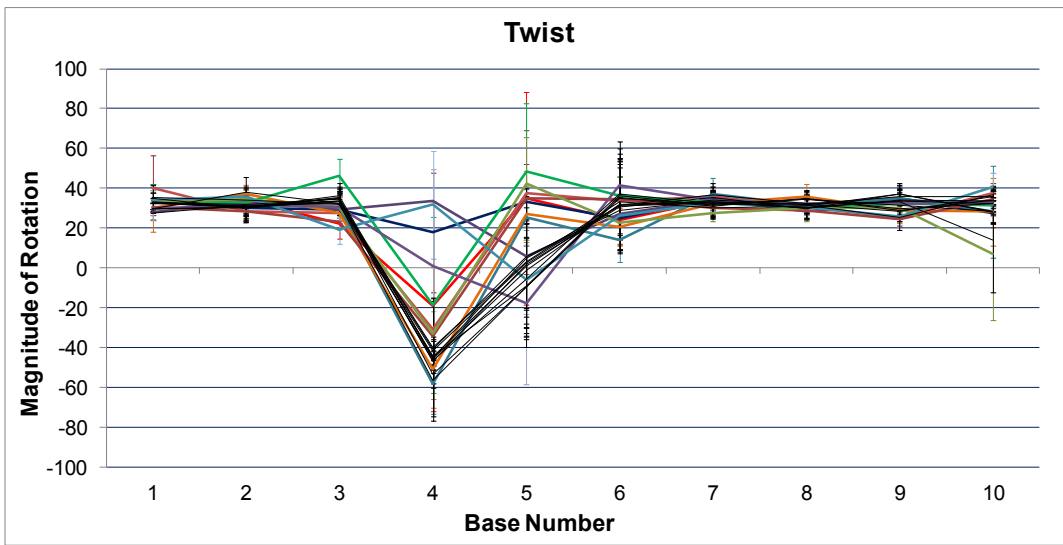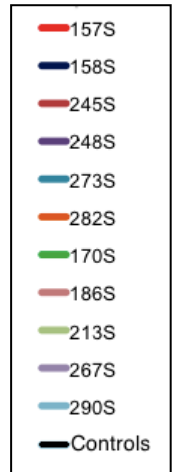

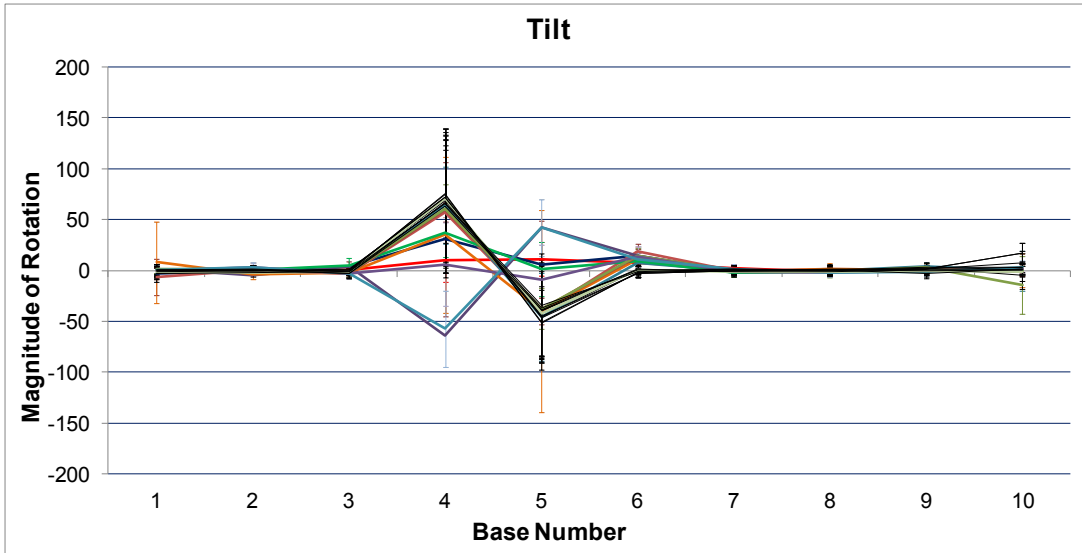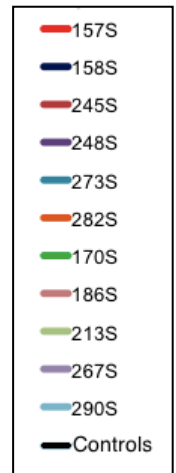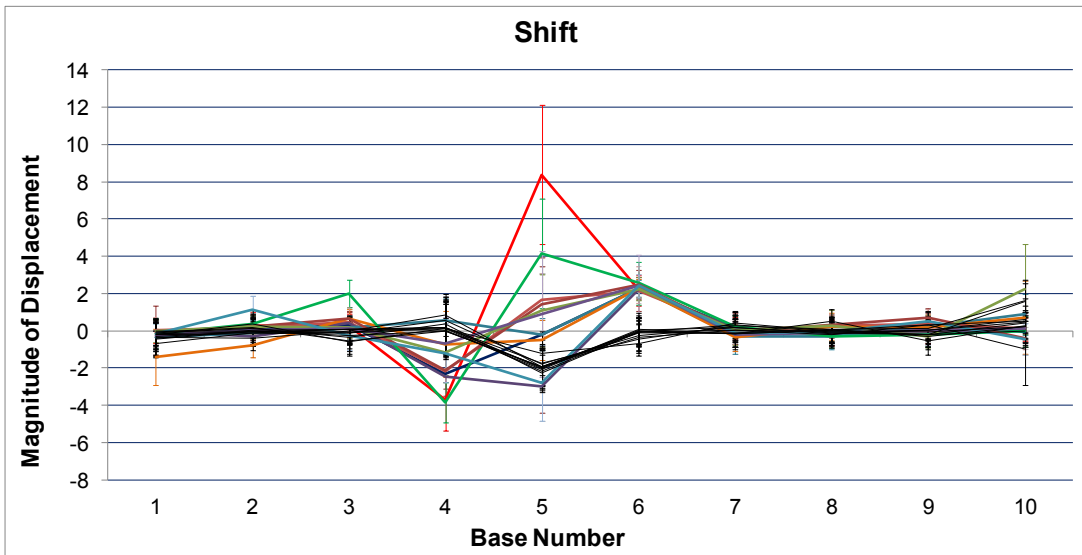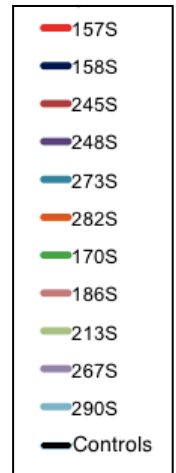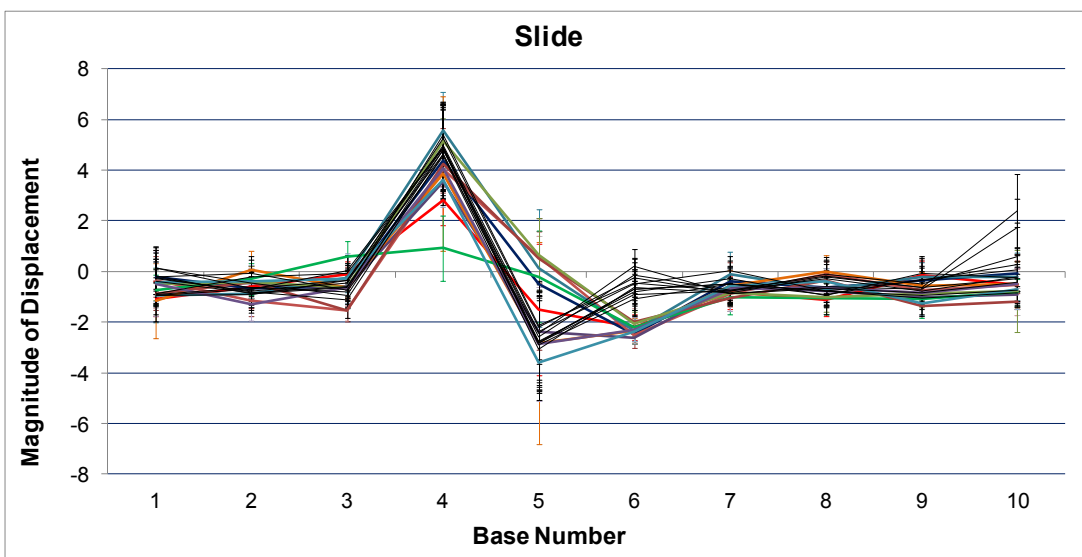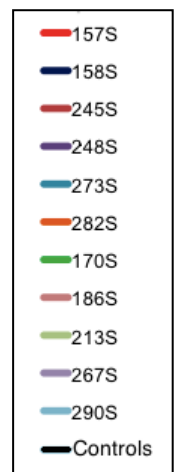

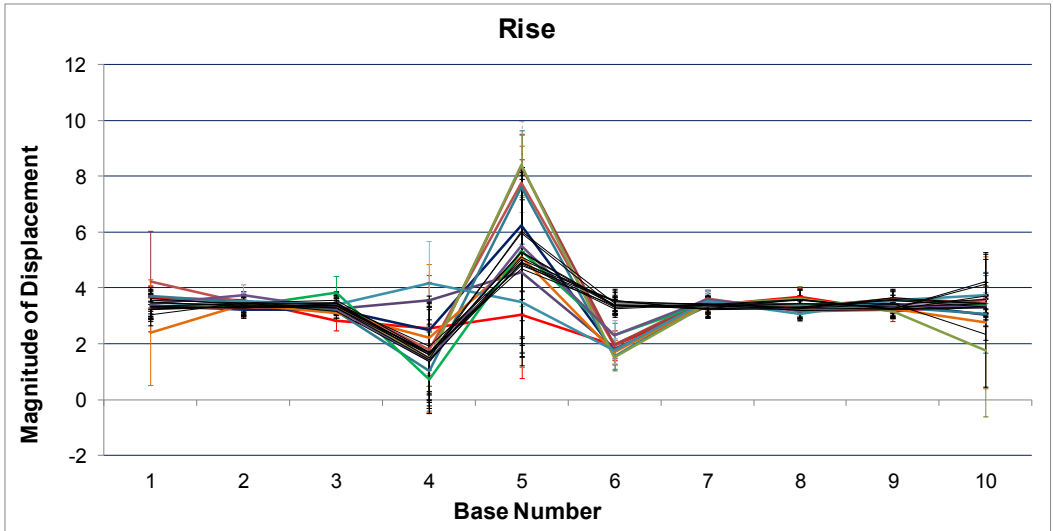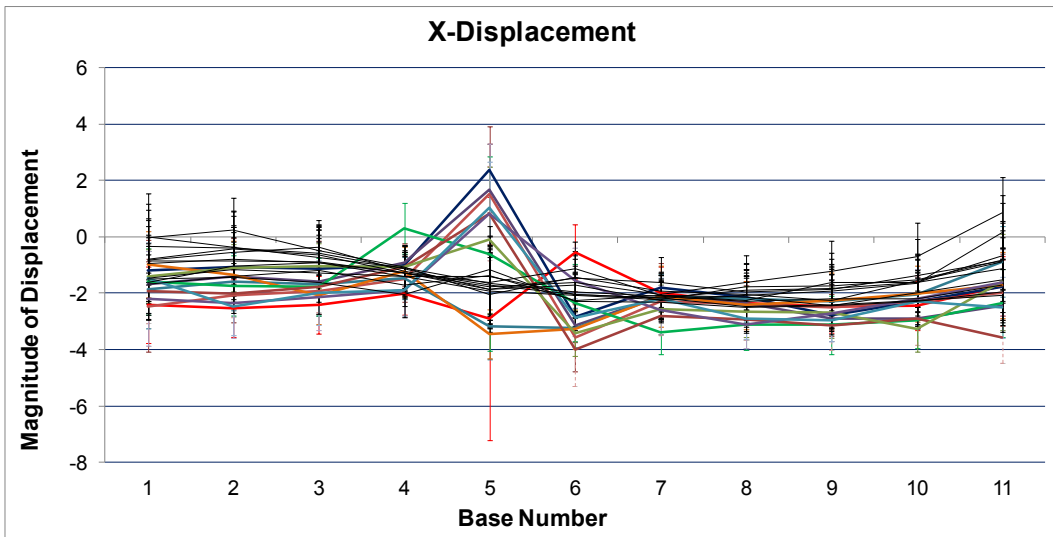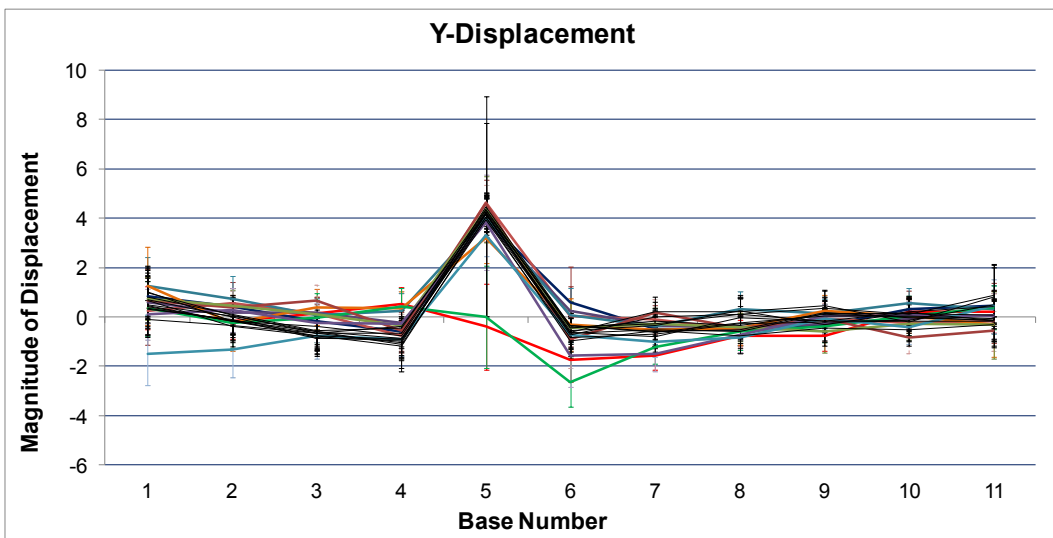

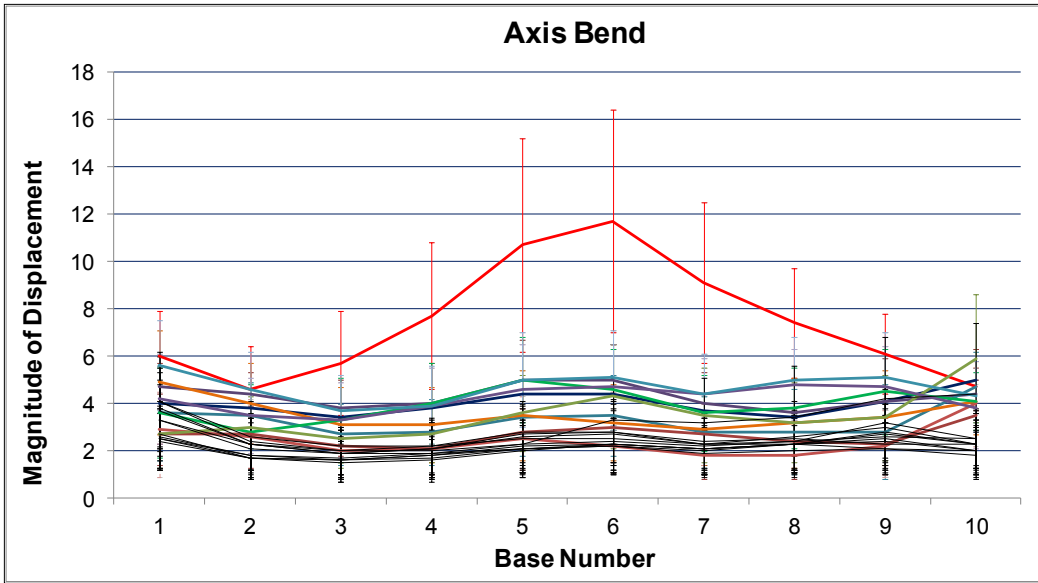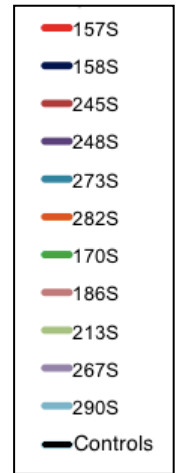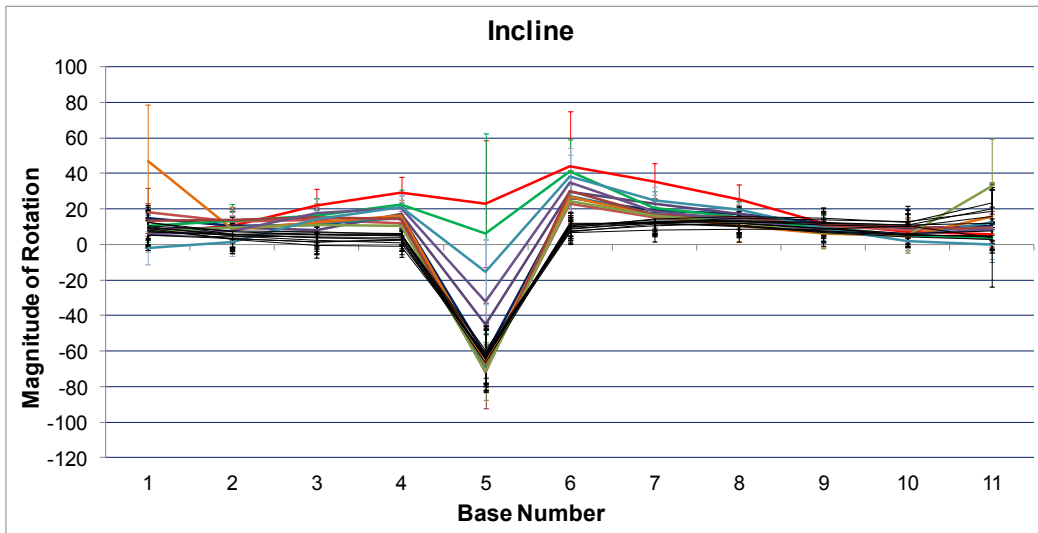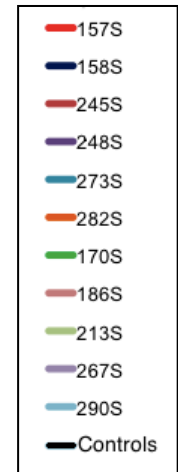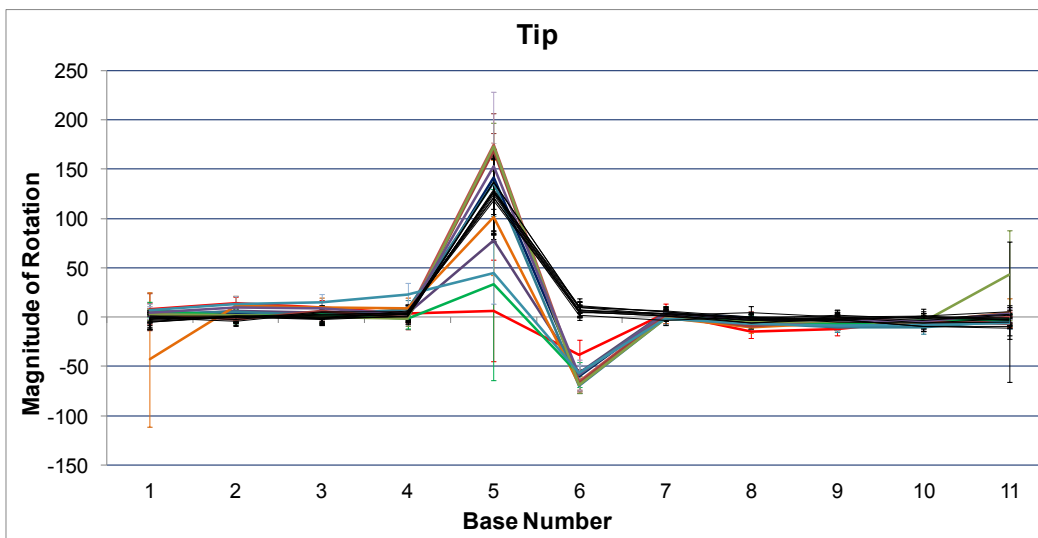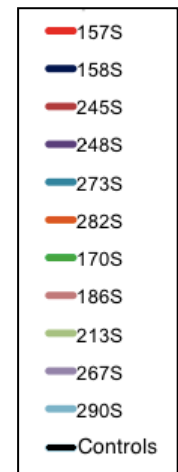

Supplementary Figure 2.

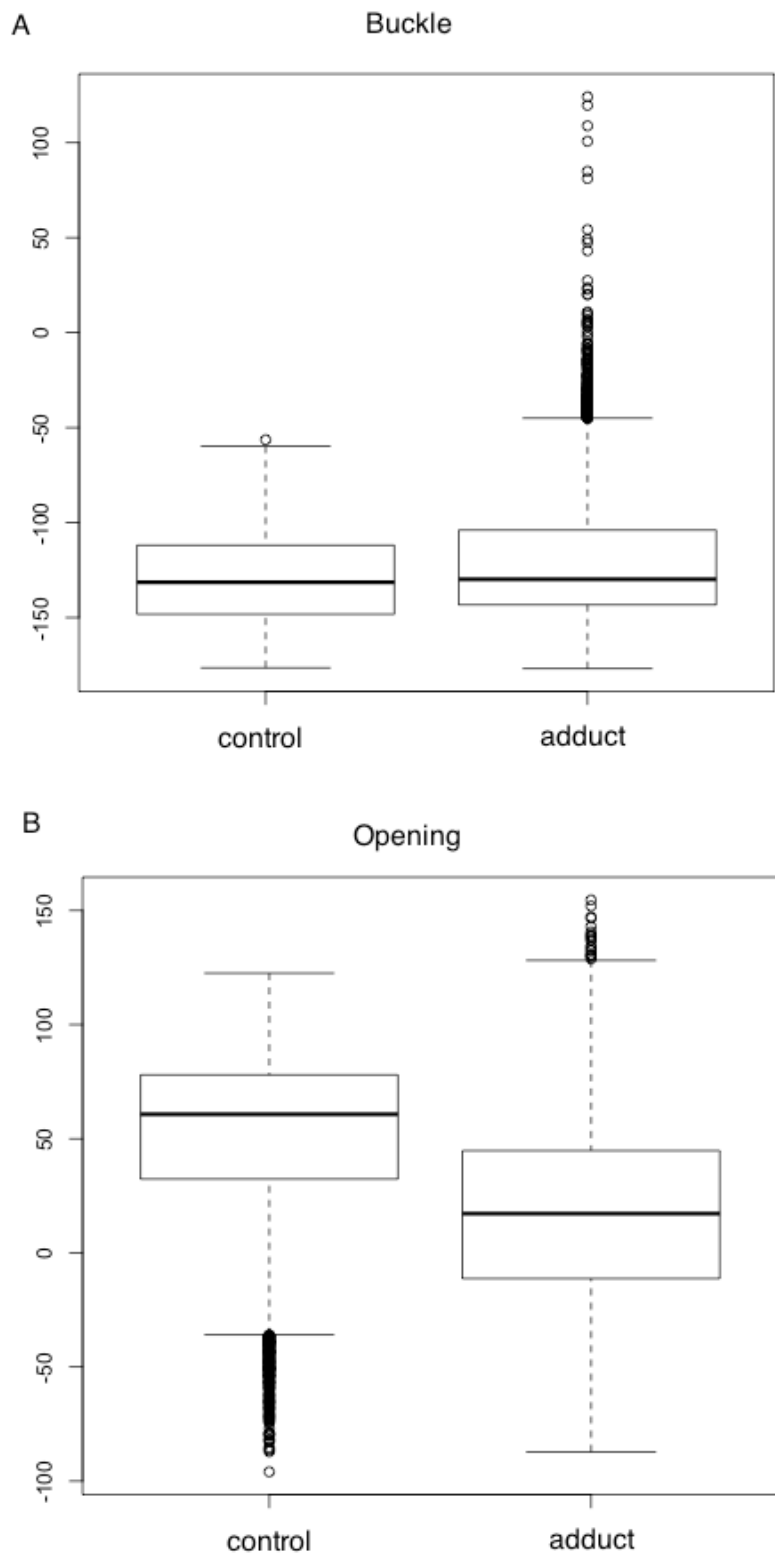

Supplement: supp_gkv910_nar-01475-f-2015-File011.pdf [file supp_gkv910_nar-01475-f-2015-File011.pdf]
